# Supplementary material for: Prognostic Biomarkers for Delayed Cerebral Ischemia Post-Aneurysmal Subarachnoid Hemorrhage: Evaluating CSF 8-iso-Prostaglandin F2α and Erythrocyte Anisocytosis
Source: Research Square preprint supplement (doi:10.21203/rs.3.rs-3899387/v1), 2024-02-05
Supplement: Supplementary file 1 [file 59bb28bd03b3afcbb4e8a915.docx]

|  | Total n=27 | DCI n=13 (48.1%) | Without DCI n=14 (51.9%) | Univariate  OR (95% CI) | *P* value | Multivariate OR (95% CI) | *P* value |
| --- | --- | --- | --- | --- | --- | --- | --- |
| **Age [years]** | 61 (50-66) | 63 (61-70) | 54 (43-61) | 1.05  (0.99-1.12) | 0.09 |  |  |
| **Gander** [male] | 11 | 6 (54.5%) | 5 (45.5%) | 1.53 (0.32-7.22) | 0.582 |  |  |
| **Intracerebral haemorrhage (ICH)** | 5 (18.5%) | 2 (15.4%) | 3 (21.4%) | 0.66 (0.09-4.8) | 0.687 |  |  |
| **Hydrocephalus (HCP)** | 14 (51.8%) | 8 (61.5%) | 6 (42.8%) | 2.13 (0.45-9.94) | 0.334 |  |  |
| **RDW-CV (%CV) – day 1** | 13.8±1.5 13(12-15) | 14.5±1.8 14(13-15) | 13.2±0.9 13(12-13) | 1.92 (1.02-3.61) | 0.04 | 1.28 (1.04-1.59) | 0.02 |
| **RDW-SD (fl) – day 1** | 43.5±8.9 42(39-50) | 47.2±10 49(44-53) | 40.1±6 40(38-42) | 1.11 (1-1.23) | 0.04 |  |  |
| **RDW-CV (%CV) – day 3** | 12.5±0.8 12(11-13) | 12.6±0.9 12(11-13) | 12.4±0.8 12(11-12) | 1.32 (0.55-3.16) | 0.525 |  |  |
| **RDW-SD (fl) – day 3** | 42.1±4.5 42(39-44) | 41.6±6 40(38-44) | 42.5±2.5 43(40-44) | 0.95 (0.8-1.13) | 0.581 |  |  |
| **RDW-CV (%CV) – day 5** | 12.9±0.9 12(12-13) | 12.8±1 12 (11-13) | 12.9±0.8 13(12-13) | 0.84 (0.36-1.94) | 0.690 |  |  |
| **RDW-SD (fl) – day 5** | 41.7±4 40(39-44) | 41.5±4 40(38-43) | 41.9±3.6 42(39-44) | 0.97 (0.8-1.17) | 0.774 |  |  |
| **ISOP CSF day 1 (pg/ml)** | 43.9±42 25(16-67) | 65.7±50 67(23-83) | 23.7±19 20(7-28) | 1.04 (1-1.08) | 0.02 | 1.09 (1.005-1.19) | 0.03 |
| **ISOP CSF day 3 (pg/ml)** | 49.3±37 43(16-80) | 65.8±39 76(21-94) | 36.4±30 22(12-59) | 1 (0.98-1) | 0.878 |  |  |
| **ISOP CSF day 5 (pg/ml)** | 46±32 43(22-53) | 61.7±52(43-76) | 31.4±17 34(16-43) | 1.05 (1.004-1.097) | 0.03 |  |  |
| **GOS at discharge**  I II III IV V |  | 0 (0%) 5 (38.5%) 5 (38.5%) 3 (23%) 0 (0%) | 0 (0%)  1 (7.1%) 9 (64.3%) 4 (28.6%) 0 (0%) | 0.44 (0.13-1.45) | 0.179 |  |  |
| **GOS after 12 months** I II III IV V |  | 6 (46.1%) 5 (38.5%) 1 (7.7%) 1 (7.7%) 0 (0%) | 4 (28.6%)  1 (7.1%) 3 (21.5%) 5 (35.7%) 1 (7.1%) | 0.46 (0.22-0.95) | 0.03 |  |  |
| **mRS after 12 months** 0 I II III IV V VI |  | 0 (0%) 0 (0%) 1 (7.7%)  0 (0%) 1 (7.7%)  5 (38.5%)  6 (46.1%) | 1 (7.1%)  0 (0%) 2 (14.3%)  5 (35.8%)  1 (7.1%)  1 (7.1%)  4 (28.6%) | 1.8 (1.03-3.46) | 0.03 |  |  |
