# Supplementary material for: Prognostic Biomarkers for Delayed Cerebral Ischemia Post-Aneurysmal Subarachnoid Hemorrhage: Evaluating CSF 8-iso-Prostaglandin F2α and Erythrocyte Anisocytosis
Source: Research Square preprint supplement (doi:10.21203/rs.3.rs-3899387/v1), 2024-02-05
Supplement: Supplementary file 3 [file c9b8e46c07dd56d38ed40355.docx]

**Table 1.** Sample size calculation.

|  | RDW-CV | RDW-SD | ISOP CSF |
| --- | --- | --- | --- |
| DCI mean | 13.42 | 35.08 | 36.55 |
| nonDCI mean | 15.20 | 48.90 | 91.40 |
| SD | 1.26 | 6.30 | 35.95 |
| Minimal sample size (total) | 27 | 14 | 25 |
